# Supplementary material for: Food amyloid fibrils are safe nutrition ingredients based on in-vitro and in-vivo assessment
Source: Springer Nature journal article supplement (doi:10.1038/s41467-023-42486-x), 2023-10-26
Supplement: MOESM1 [file 41467_2023_42486_MOESM1_ESM.pdf]

## **Food Amyloid Fibrils are Safe Nutrition Ingredients based on *In-vitro* and *In-vivo* Assessment**

Dan Xu<sup>1,2,†</sup>, Jiangtao Zhou<sup>2,†,\*</sup>, Wei Long Soon<sup>2,3</sup>, Ines Kutzli<sup>2</sup>, Adrian Molière<sup>4</sup>, Sabine Diedrich<sup>2</sup>, Milad Radiom<sup>2,5</sup>, Stephan Handschin<sup>6</sup>, Bing Li<sup>1</sup>, Lin Li<sup>1</sup>, Shana J. Sturla<sup>2</sup>, Collin Y. Ewald<sup>4</sup>, and Raffaele Mezzenga<sup>2,7,\*</sup>

<sup>1</sup> School of Food Science and Engineering, Guangdong Province Key Laboratory for Green Processing of Natural Products and Product Safety, Engineering Research Center of Starch and Plant Protein Deep Processing, Ministry of Education, South China University of Technology, 381 Wushan Road, Tianhe District, Guangzhou, 510640, China

<sup>2</sup> Institute of Food, Nutrition and Health (IFNH), Department of Health Sciences and Technology (HEST), ETH Zurich, Zürich 8092, Switzerland

<sup>3</sup> Center for Sustainable Materials (SusMat), School of Materials Science and Engineering, Nanyang Technological University, 639798 Singapore

<sup>4</sup> Institute of Translational Medicine, Department of Health Sciences and Technology (HEST), ETH Zurich, Schwerzenbach, Switzerland

<sup>5</sup> Laboratory of Food Immunology, Institute of Food, Nutrition and Health, ETH Zürich, Zürich, Switzerland

<sup>6</sup> Scientific Center for Optical and Electron Microscopy (ScopeM), ETH Zurich, Otto-Stern-Weg 3, 8093 Zurich, Switzerland

<sup>7</sup> Department of Materials, ETH Zurich, Zürich 8092, Switzerland

† These authors contributed equally

\*Corresponding authors: [jiangtao.zhou@hest.ethz.ch](mailto:jiangtao.zhou@hest.ethz.ch), [raffaele.mezzenga@hest.ethz.ch](mailto:raffaele.mezzenga@hest.ethz.ch)

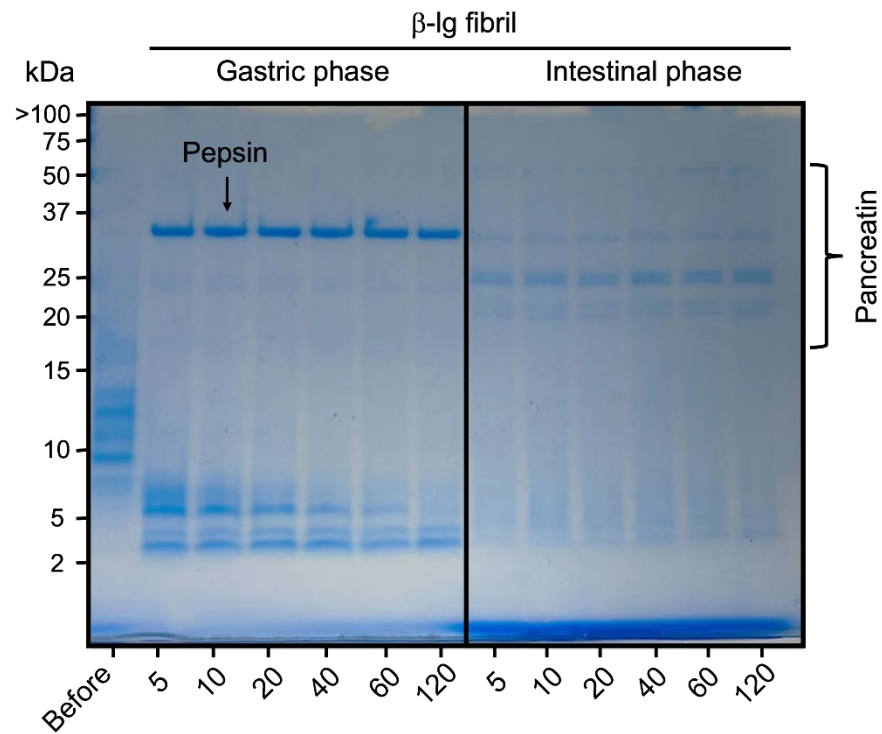

Supplementary Figure 1. A higher percentage SDS-PAGE gel (15%) of  $\beta$ -lg amyloid digestion showing a higher resolution at the lower molecular weight components during intestinal digestion, demonstrating full hydrolysis after complete gastrointestinal digestion.

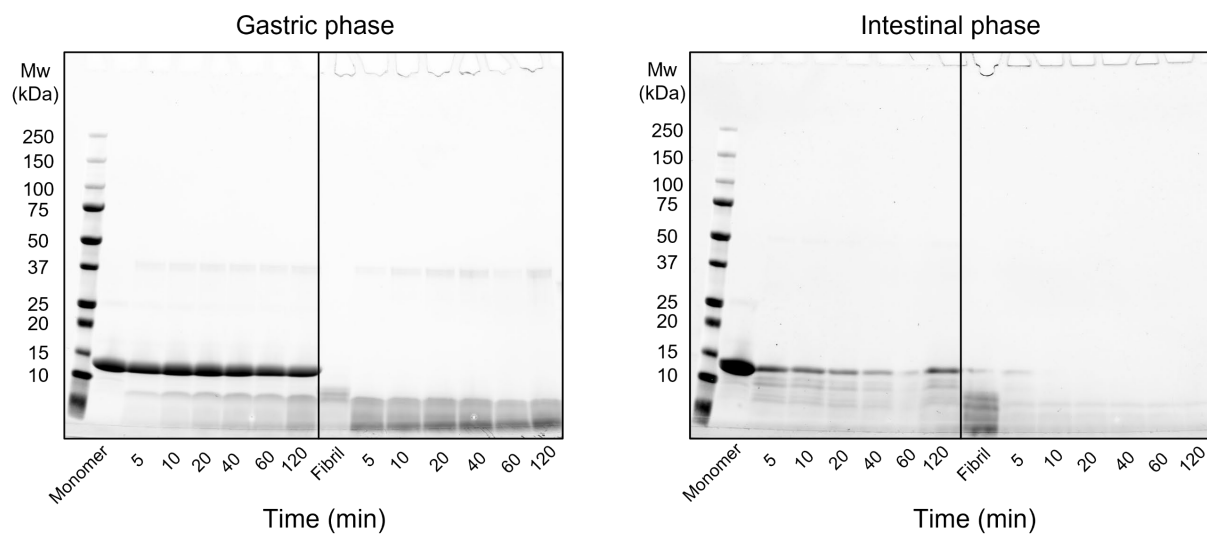

Supplementary Figure 2. Digestion fate of lysozyme in vitro. The SDS-PAGE of the gastric (left panel) and intestinal (right panel) digestion phases. In each panel, the lysozyme monomer is in the left part and amyloid fibril is in the right part.

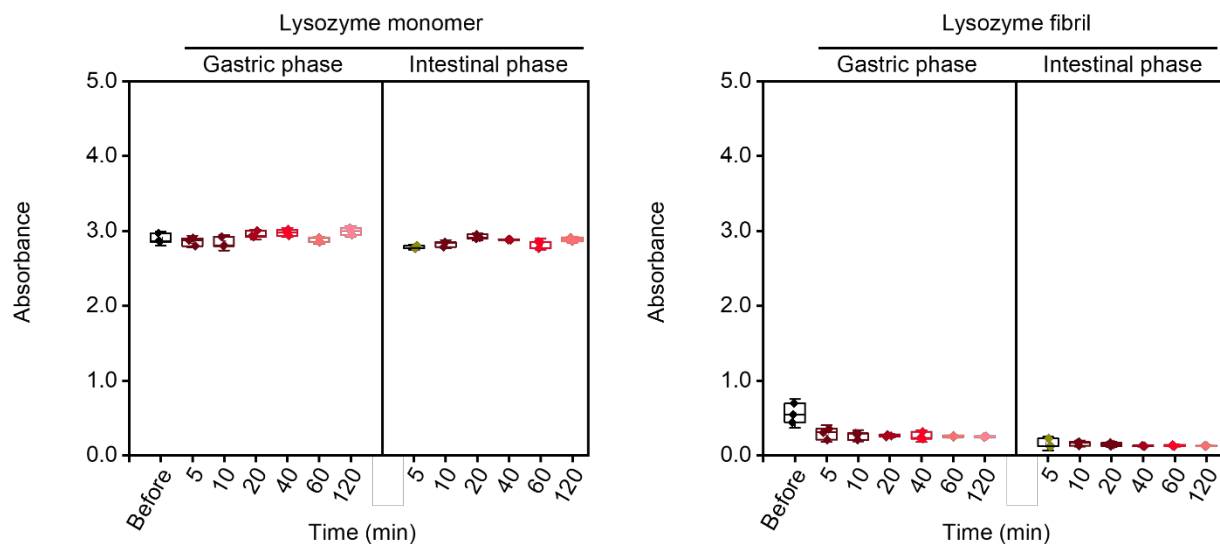

Supplementary Figure 3. ELISA antigenicity assay of lysozyme monomer and amyloid fibrils over the course of gastrointestinal digestion. The boxes cover the range of 25-75 percentage, the whisker lines and centre lines refer to SD and median value respectively. The plots are showed as mean values  $\pm$  standard deviation. N=3 independent experiments.

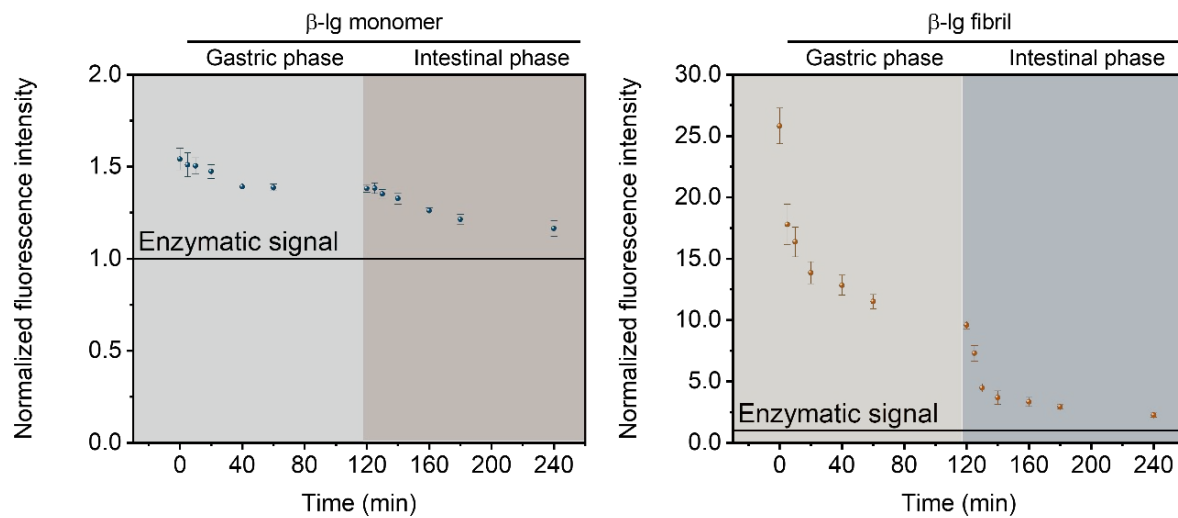

Supplementary Figure 4. ThT fluorescence assay of  $\beta$ -Ig monomer and amyloid fibrils over the course of gastrointestinal digestion. Enzymatic signal refers to the background contribution intensity from digestive enzymes. N=3 independent experiments.

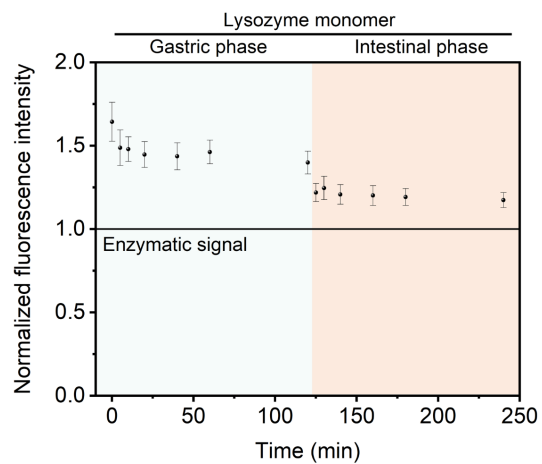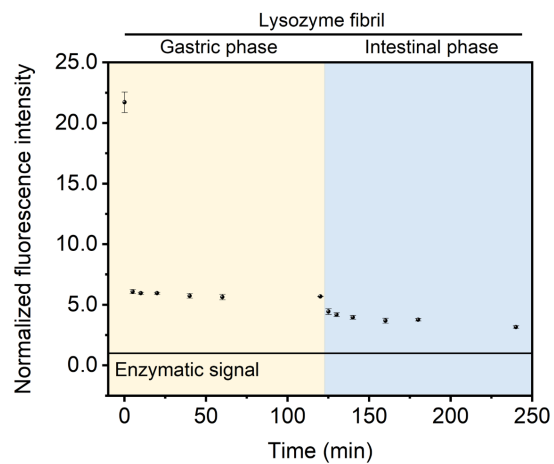

Supplementary Figure 5. TO fluorescence assay of lysozyme monomer and amyloid fibrils over the gastrointestinal digestion. Enzymatic signal refers to the background contribution intensity from digestive enzymes. Error bars represent SD. N=3 independent experiments.

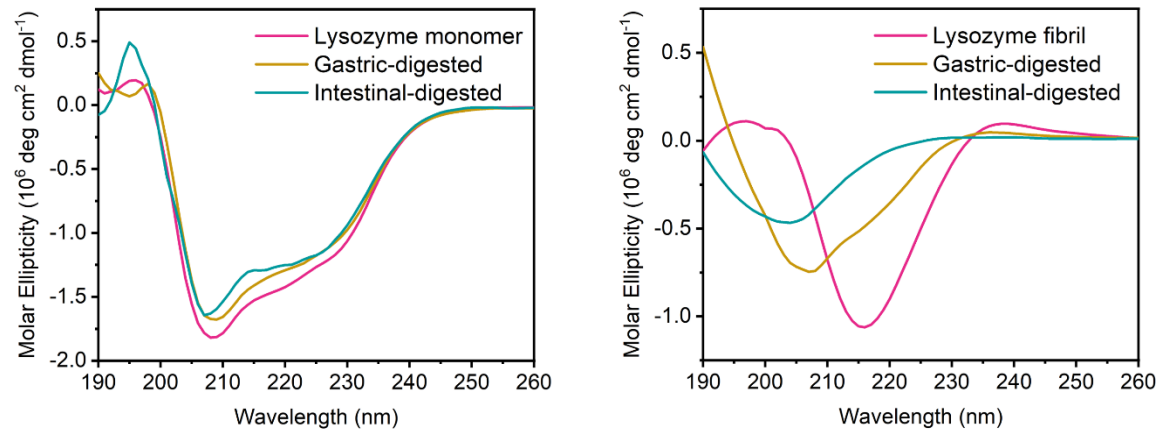

Supplementary Figure 6. Circular dichroism spectra of lysozyme monomer and amyloid fibrils after gastric and intestinal digestion. Lysozyme monomer is in the left panel, and lysozyme fibril is in the right panel.

Gastric-digested

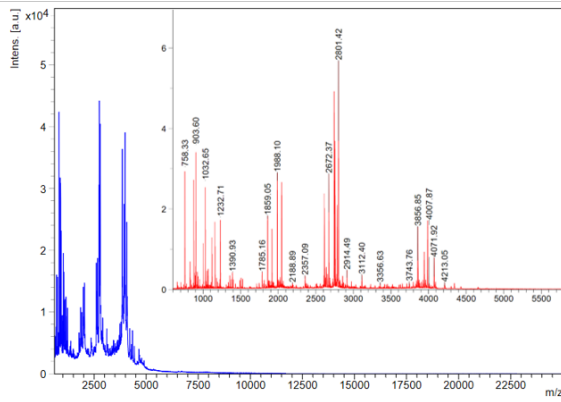

Intestinal-digested

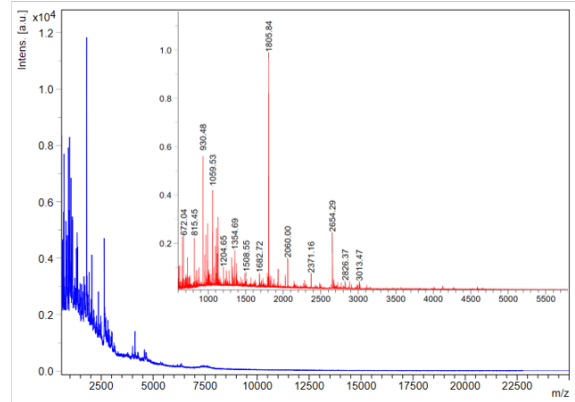

Supplementary Figure 7. MALDI-MS spectra of 10 kDa filter permeates gastric and intestinal digested  $\beta$ -Ig amyloid fibrils. Left panel shows the permeate are gastric digestion, and the right panel after additional intestinal digestion. The insets are in reflector mode.



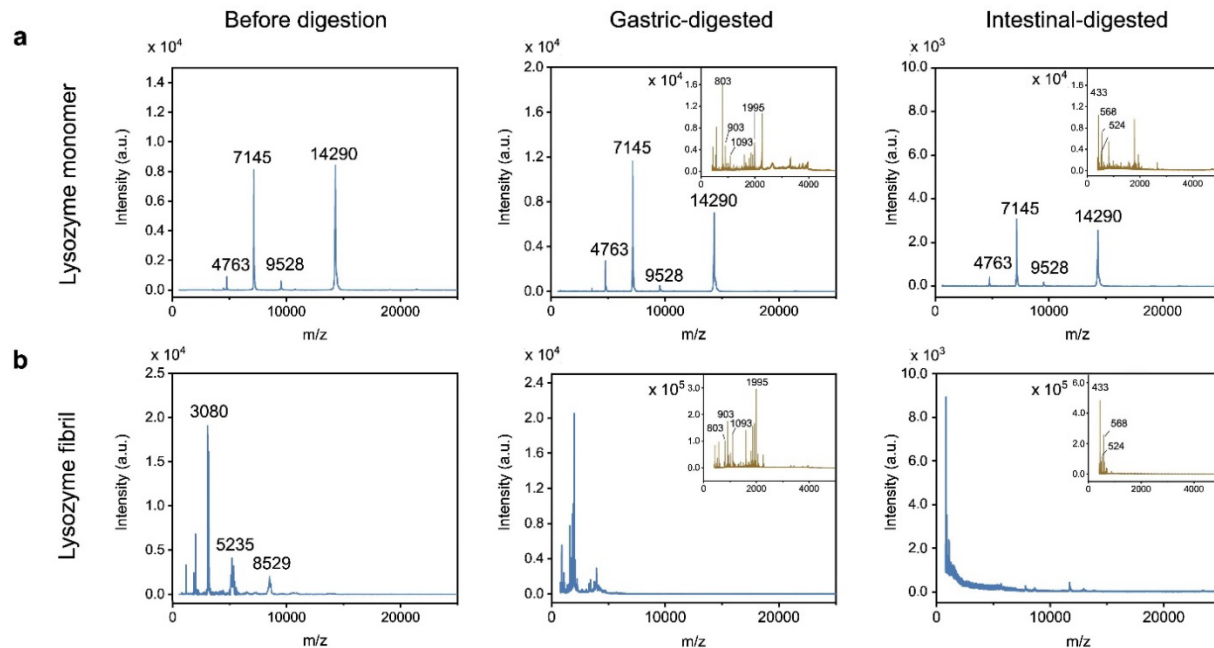

Supplementary Figure 8. MALDI-MS spectra of lysozyme monomer (a) and amyloid fibrils (b) digested products. The blue plots were obtained in linear mode in the range of 0.5 to 25 kDa, and the inserted plots were recorded in reflection mode in the range of 0.4 to 5 kDa.

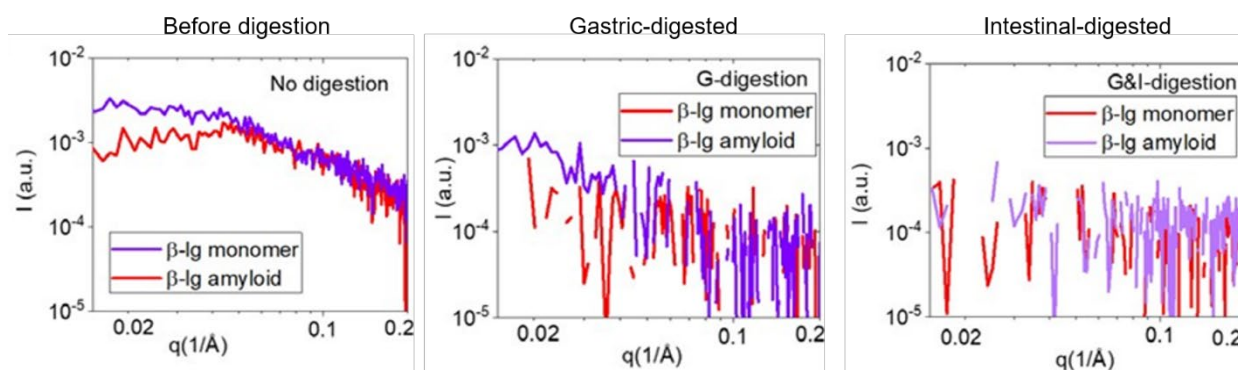

Supplementary Figure 9. Background subtracted SAXS profiles of  $\beta$ -Ig monomer and amyloid fibril before digestion, after gastric digestion, and intestinal digestion.

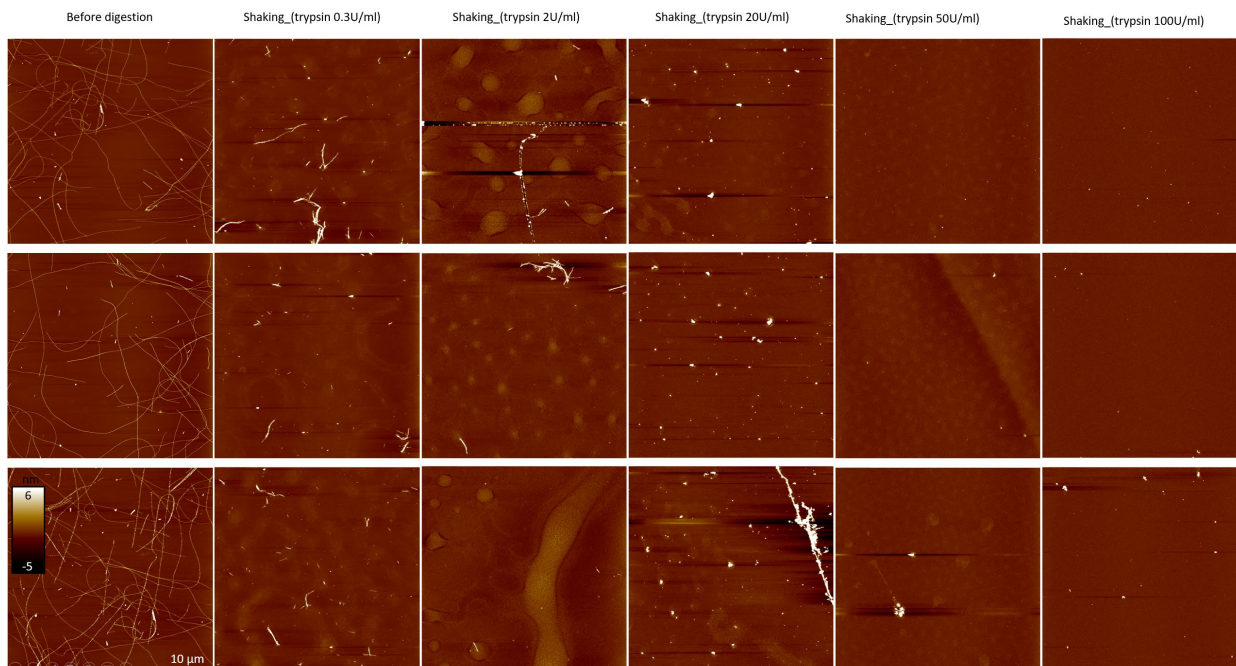

Supplementary Figure 10. AFM images of  $\beta$ -lg amyloid fibrils after gastrointestinal digestion in the INFOGEST protocol under the shaking condition, at different concentrations of trypsin ranging from 0.3 U/mL to 100 U/mL. The fibrils are fully digested with trypsin concentration of around 50 U/mL. AFM images were collected in random locations on the mica surface at a size of 15 by 15  $\mu$ m. N=3 independent experiments.

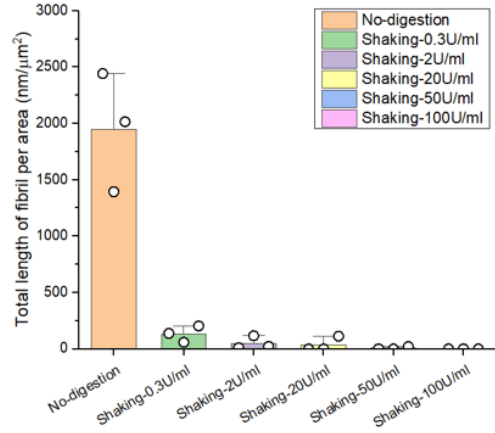

|                 | Total length of fibril per area (nm/μm <sup>2</sup> ) |           |           | Average (nm/μm <sup>2</sup> ) |
|-----------------|-------------------------------------------------------|-----------|-----------|-------------------------------|
| No digestion    | 2015.20                                               | 1395.10   | 2442.46   | 1950.92±526.63                |
| Shaking-0.3U/ml | 58.38448                                              | 137.65216 | 204.30097 | 133.45±400.34                 |
| Shaking-2U/ml   | 116.17881                                             | 10.13063  | 21.94973  | 49.42±58.12                   |
| Shaking-20U/ml  | 0                                                     | 0         | 113.21422 | 37.73807                      |
| Shaking-50U/ml  | 0                                                     | 0         | 19.72806  | 6.57602                       |
| Shaking-100U/ml | 0                                                     | 0         | 0         | 0                             |

Supplementary Figure 11. AFM statistical analysis of  $\beta$ -lg amyloid fibril length after gastrointestinal digestion in the INFOGEST protocol under the shaking condition. N=3 independent experiments. The total length of fibril per area was calculated at different concentrations of trypsin ranging from 0.3 U/mL to 100 U/mL. Data are presented as mean±SD.

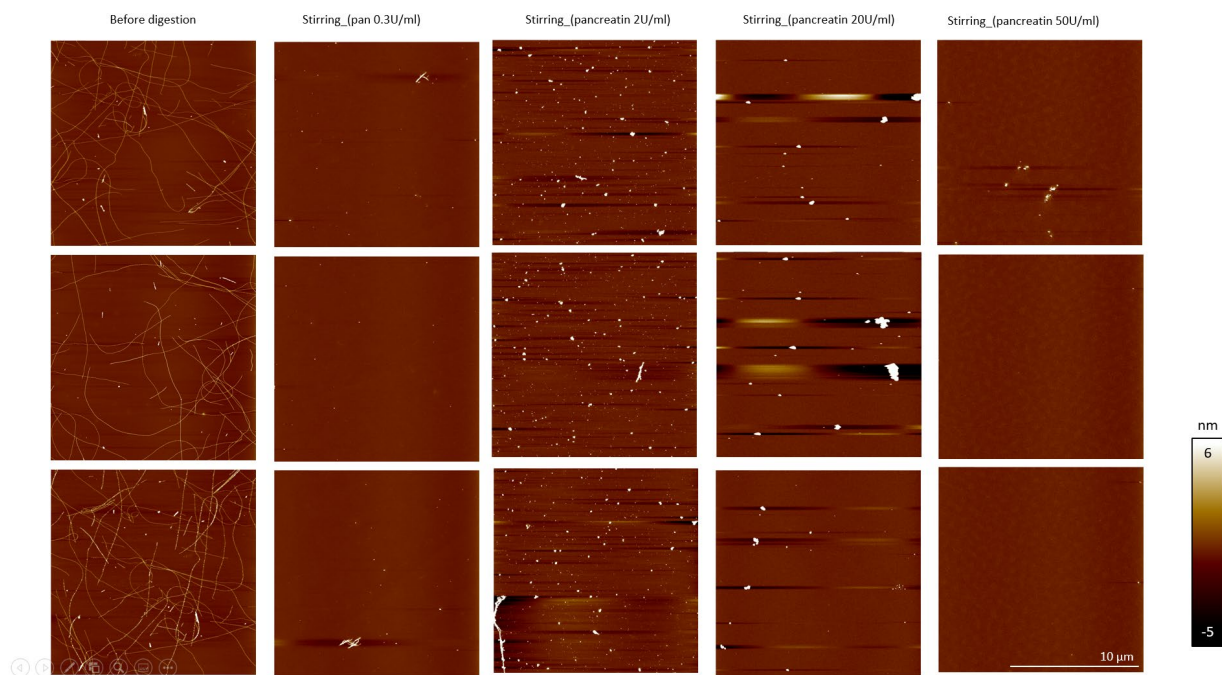

Supplementary Figure 12. AFM images of  $\beta$ -lg amyloid fibrils after gastrointestinal digestion in the INFOGEST protocol under the moderate stirring condition, at different concentrations of trypsin ranging from 0.3 U/mL to 100 U/mL. The fibrils are fully digested with the trypsin concentration of around 20 U/mL. AFM images were collected in random locations on the mica surface at a size of 15 by 15  $\mu$ m. N=3 independent experiments.

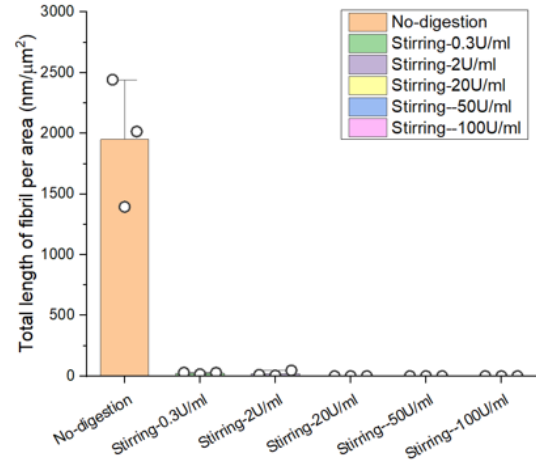

|                 | Total length of fibril per area (nm/μm <sup>2</sup> ) |          |          | Average (nm/μm <sup>2</sup> ) |
|-----------------|-------------------------------------------------------|----------|----------|-------------------------------|
| No digestion    | 2015.20                                               | 1395.10  | 2442.46  | 1950.92±526.63                |
| Shaking-0.3U/ml | 15.90687                                              | 28.70346 | 28.43687 | 24.35±7.31                    |
| Shaking-2U/ml   | 5.15418                                               | 10.66382 | 46.8535  | 20.89±22.65                   |
| Shaking-20U/ml  | 0                                                     | 0        | 0        | 0                             |
| Shaking-50U/ml  | 0                                                     | 0        | 0        | 0                             |
| Shaking-100U/ml | 0                                                     | 0        | 0        | 0                             |

Supplementary Figure 13. AFM statistical analysis of  $\beta$ -lg amyloid fibrils after gastrointestinal digestion in the stirring INFOGEST protocol. N=3 independent experiments. The total length of fibril per area were calculated at different concentrations of trypsin ranging from 0.3 U/mL to 100 U/mL. Data are presented as mean±SD.

**After digestion without enzymes**

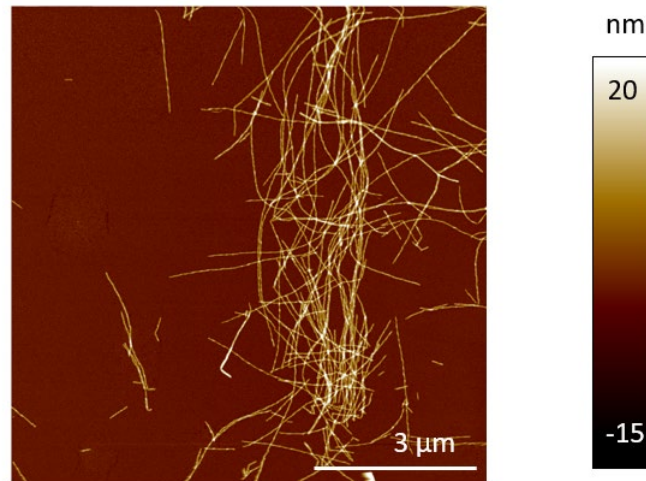

Supplementary Fig. 14. AFM image of  $\beta$ -lg amyloid fibrils after gastrointestinal digestion without digestive enzymes. The fibrils remained intact overall but tended to entangle together which is believed due to the enlarged the ionic strength by mixing with the SGF and SIF buffer.

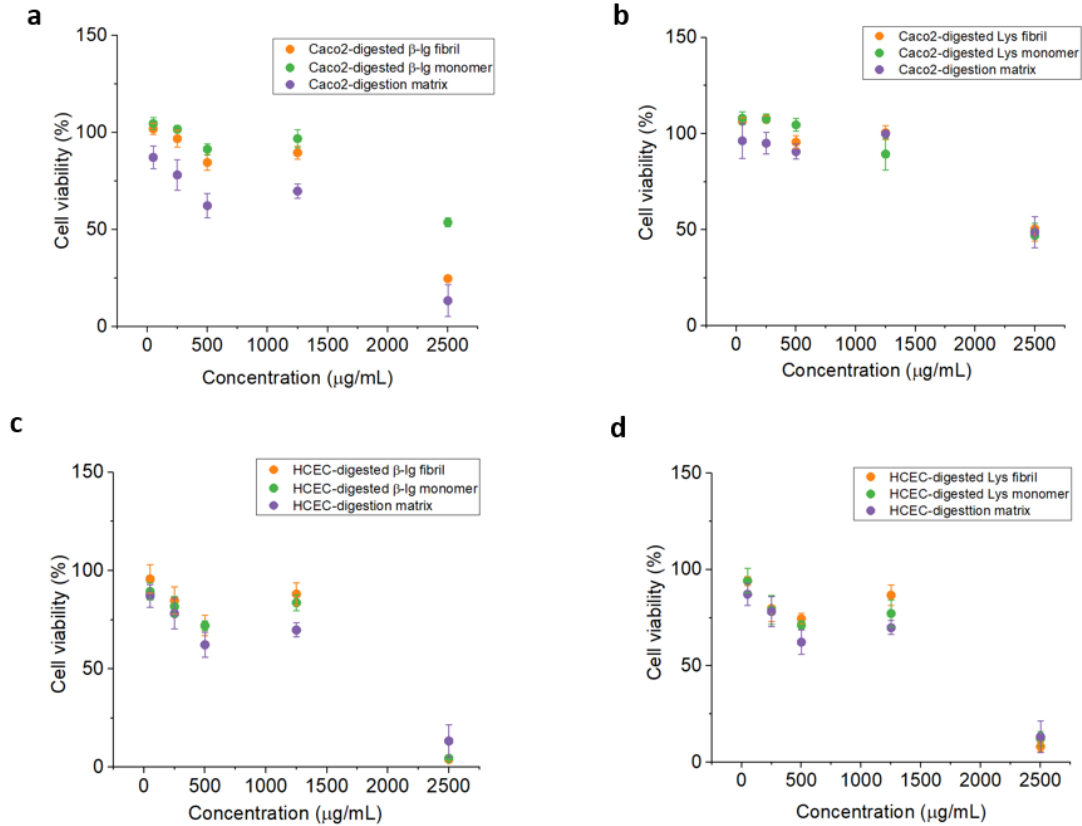

Supplementary Figure 15. Impact of digested fibrils, digested monomer or digestion matrix on viability of human cell lines. (a) BLG in Caco2 cells; (b) Lys in Caco-2 cells; (c) BLG in HCEC cells; (d) Lys in HCEC cells. Cell viability was evaluated on the basis of quantification of ATP present as an indicator of metabolically active cells, performed using the CellTiter-Glo luminescent cell viability assay. Cells were exposed for 4 h. Each cell viability measurement was performed in triplicate and repeated three times. The % cell viability values for exposed cells were normalized to corresponding values for the same cells incubated in the same cell culture medium without addition of the test substances or matrix. Results are shown as mean values $\pm$ SD. N=3 biological replicates.



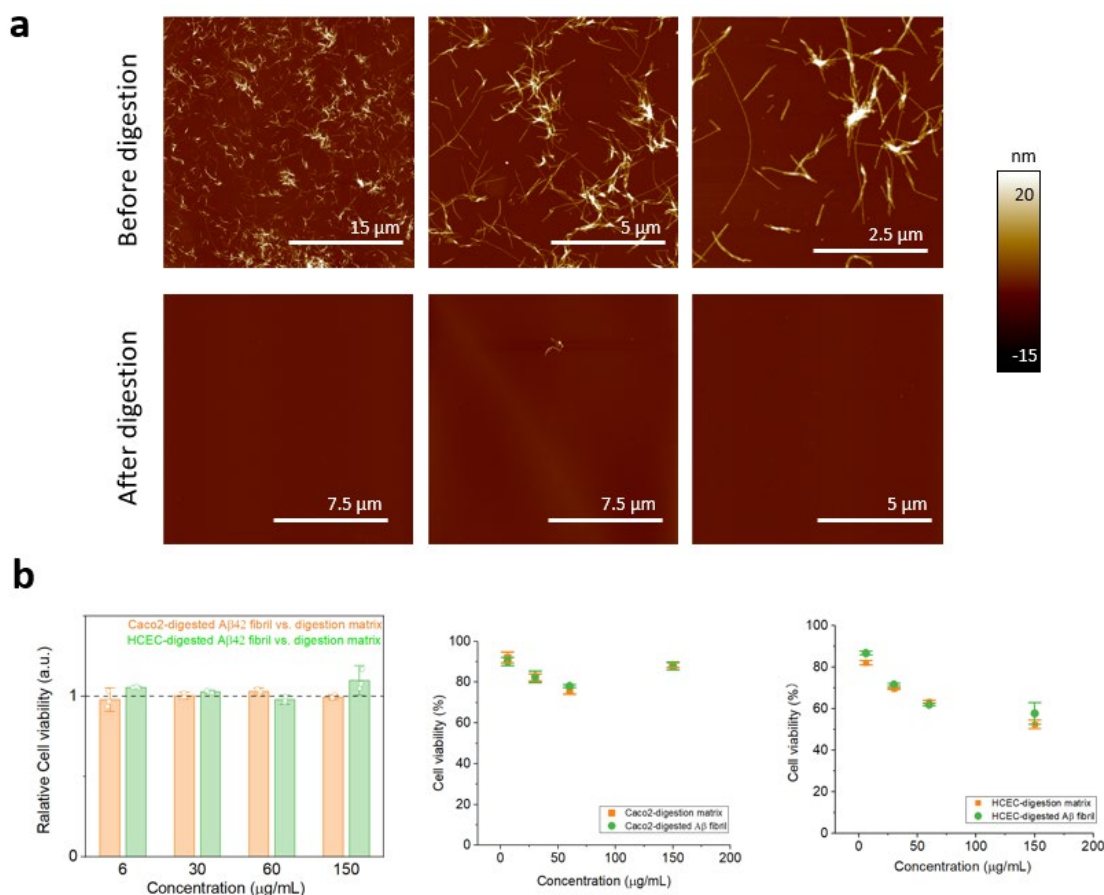

Supplementary Figure 16. The digestion of Aβ42 fibrils and the effect of in-vitro digested protein amyloids on cell viability. (a) The digestion of Aβ42 fibrils upon the trypsin enzyme activity of 0.3U/mL. The Aβ42 fibrils were obtained at the concentration of 50 μM in the buffer of 1:1 mixture of 0.1% NH<sub>4</sub>OH and 100 mM Tris buffer (with 0.02% NaN<sub>3</sub> and pH 7.4). (b) the relative Caco2 and HCEC cell viability in the left panel treated with digested fibril vs. digestion buffer at the treatment concentration of 6, 30, 60 and 150 μg/mL. Cell viability was evaluated on the basis of quantification of ATP present as an indicator of metabolically active cells, performed using the CellTiter-Glo luminescent cell viability assay. Cells were exposed for 4 h. Each cell viability measurement was performed in triplicate and repeated three times. The cell viability values for exposed cells were normalized to corresponding values for the same cells incubated in the same cell culture medium without addition of Aβ42 and enzymes. Results are shown as mean values±SD.

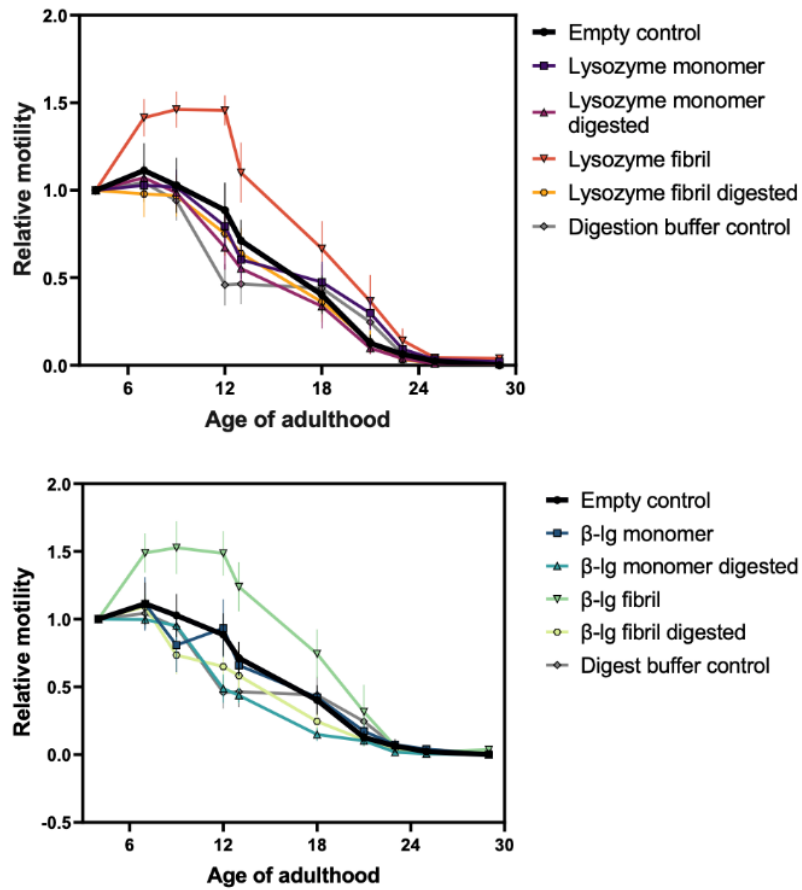

Supplementary Figure 17. Duplicate experiment of *C. elegans* motility, demonstrating higher relative motilities / improved health when *C. elegans* is fed with  $\beta$ -lg and lysozyme fibrils. N=3 biological replicates. Data are presented as mean $\pm$ SEM.

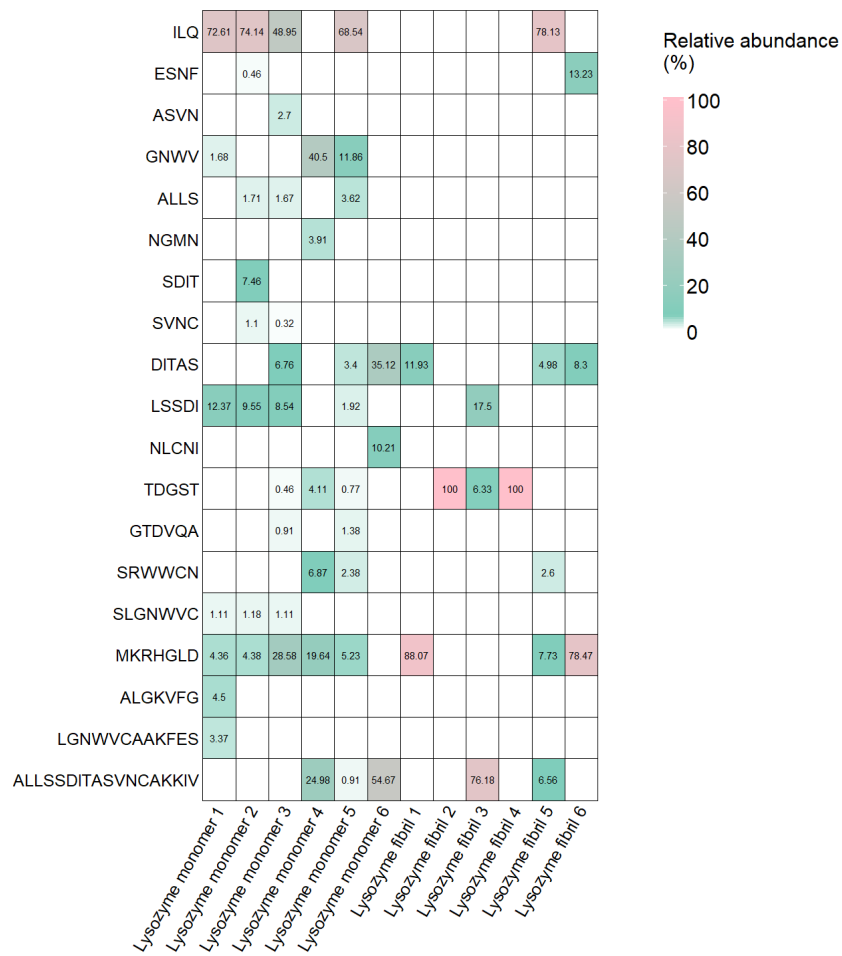

Supplementary Figure 18. Identified digested polypeptides of lysozyme monomer and fibrils in intestine of mice after 4 h oral administration. Color scale represents the intensity of the relative abundance of digested polypeptides.

a

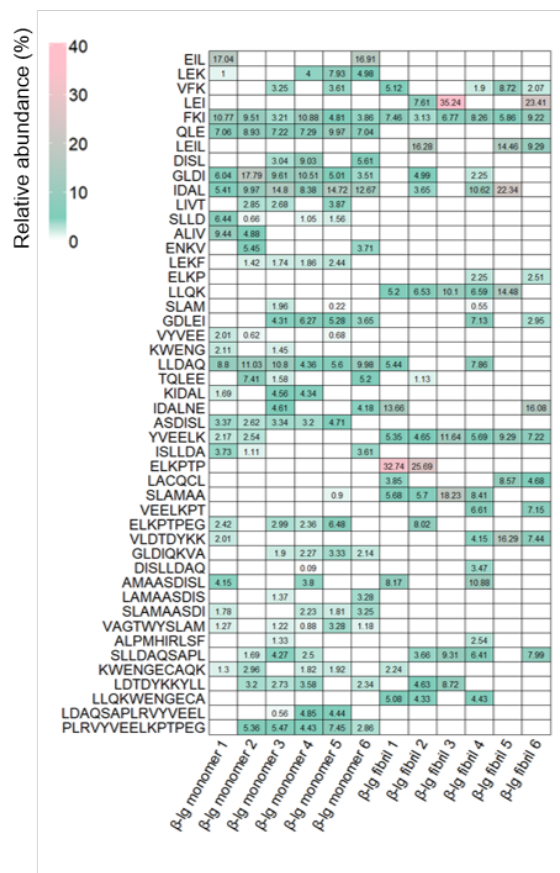

b

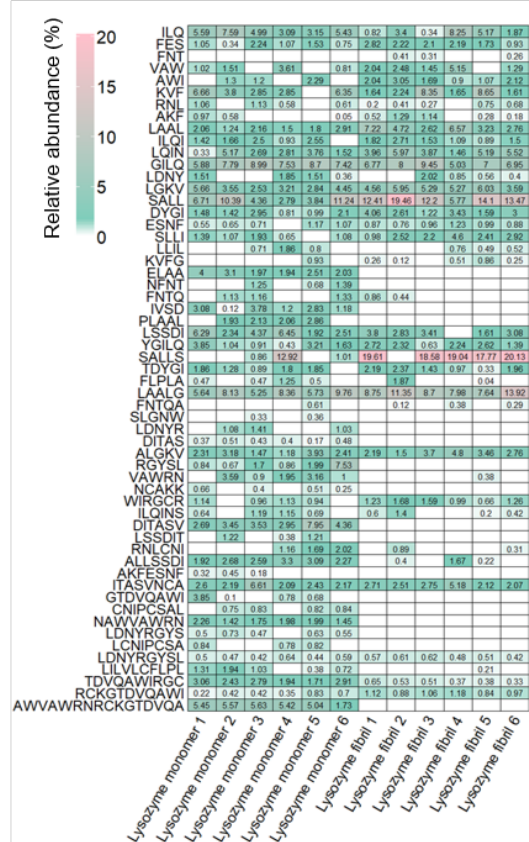

Supplementary Figure 19. Identified digested polypeptides of  $\beta$ -Ig (a) and lysozyme (b) monomer and fibrils in colon of mice after 4 h oral administration. Color scale represents the intensity of the relative abundance of digested polypeptides.

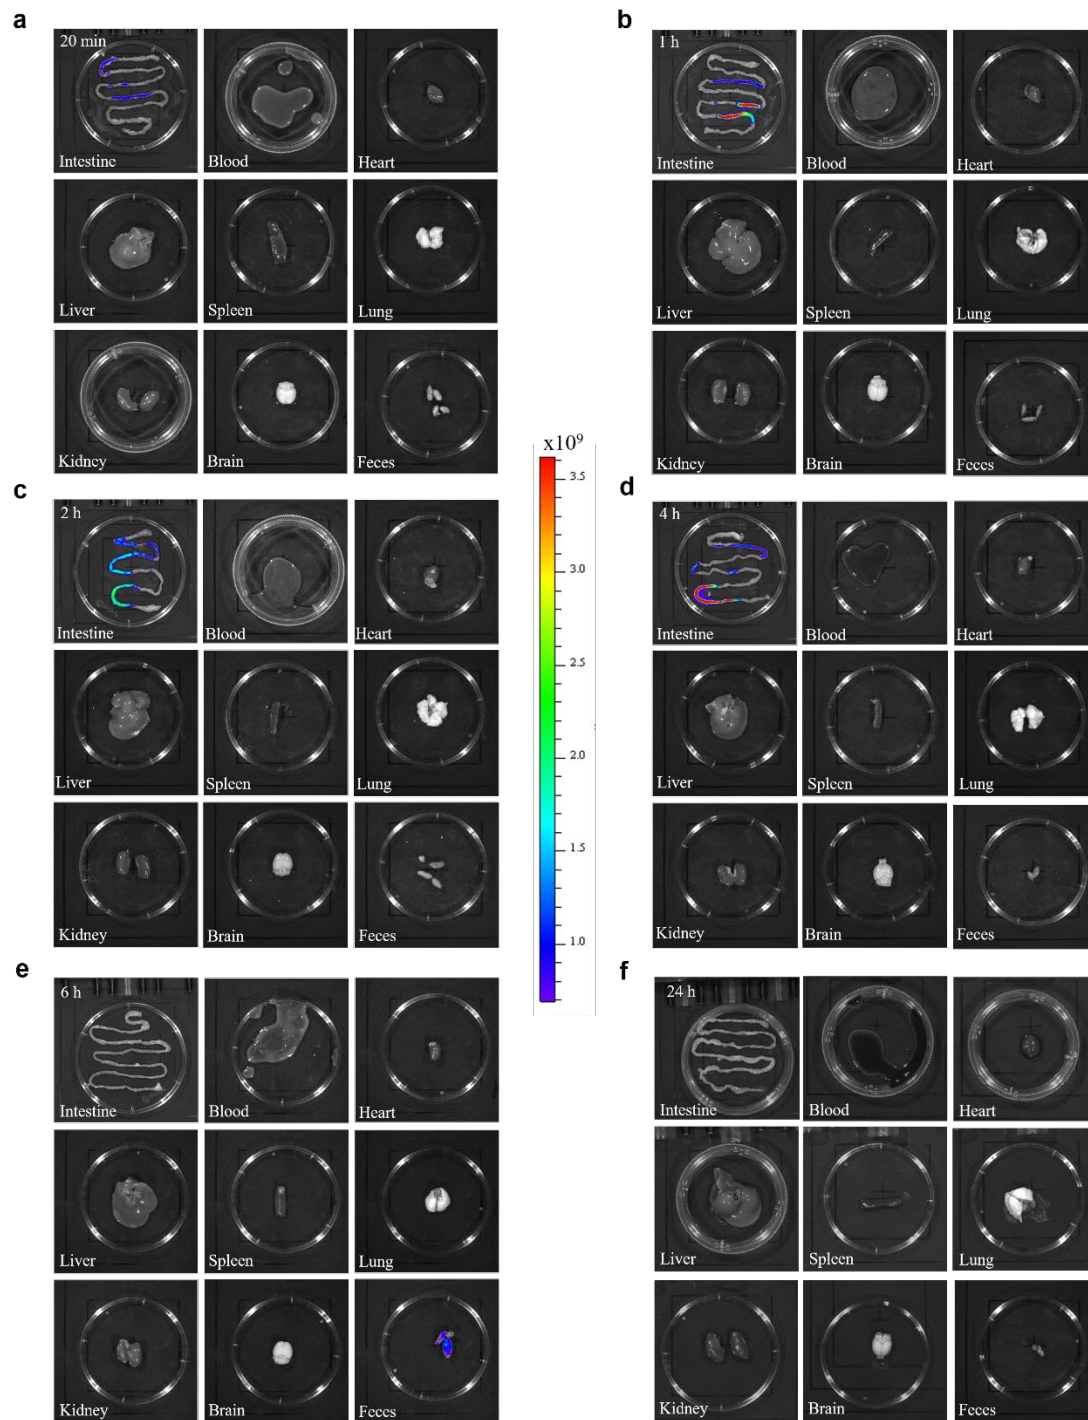

Supplementary Figure 20. Fluorescence images of 5-DTAF-labeled  $\beta$ -Ig fibril distribution in main organs and feces of mice after 20 min (a), 1 h (b), 2 h (c), 4 h (d), 6 h (e), and 24 h (f) of oral administration.

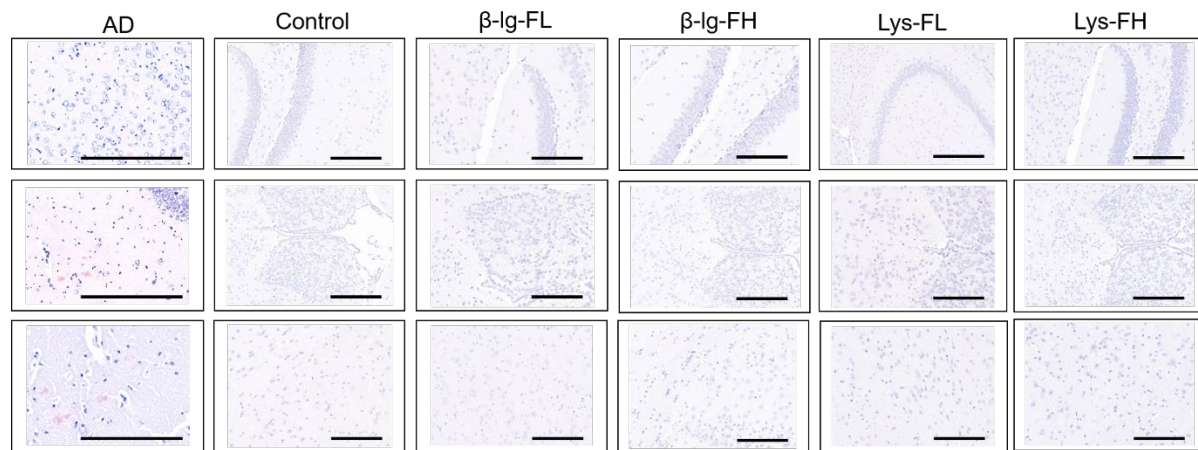

Supplementary Figure 21. Micrographs of CR-stained brain tissue sections from different mice groups after 30 d of feeding food amyloid (where F stands for fibril, H and L stand for high and low dosage). Scale bars represent 200  $\mu$ m.



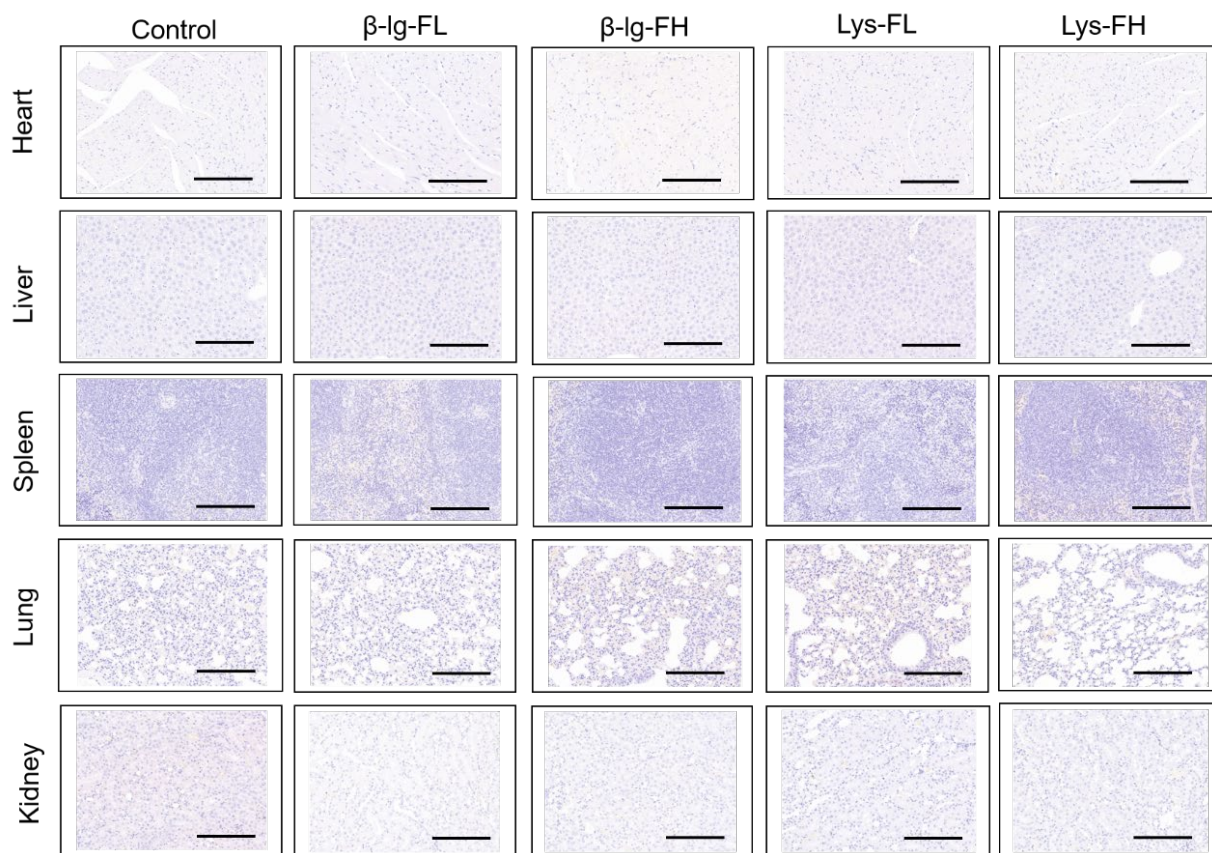

Supplementary Figure 22. Micrographs of CR-stained major organ tissue sections from different mice groups after 30 d of feeding food amyloid (where F stands for fibril, H and L stand for high and low dosage). Scale bars represent 200  $\mu$ m.

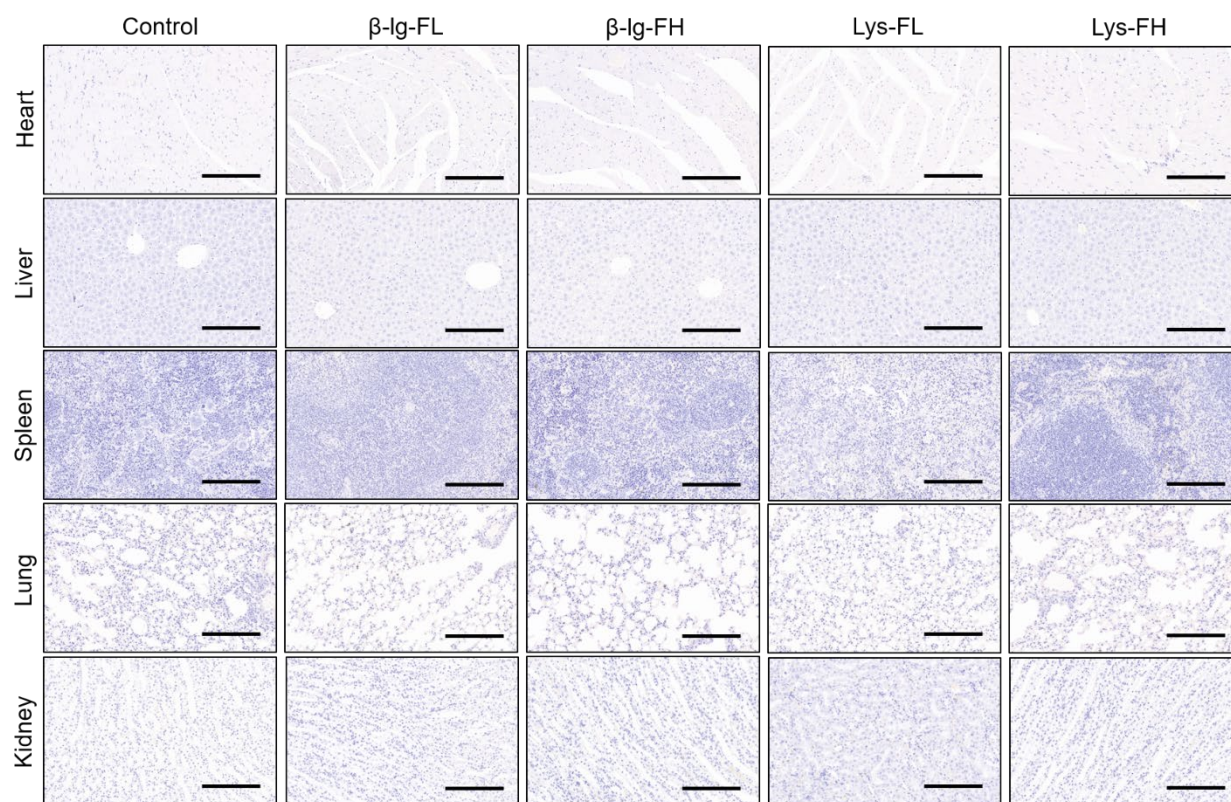

Supplementary Figure 23. Micrographs of CR-stained major organ tissue sections from different mice groups after 60 d of feeding food amyloid (where F stands for fibril, H and L stand for high and low dosage). Scale bars represent 200  $\mu$ m.



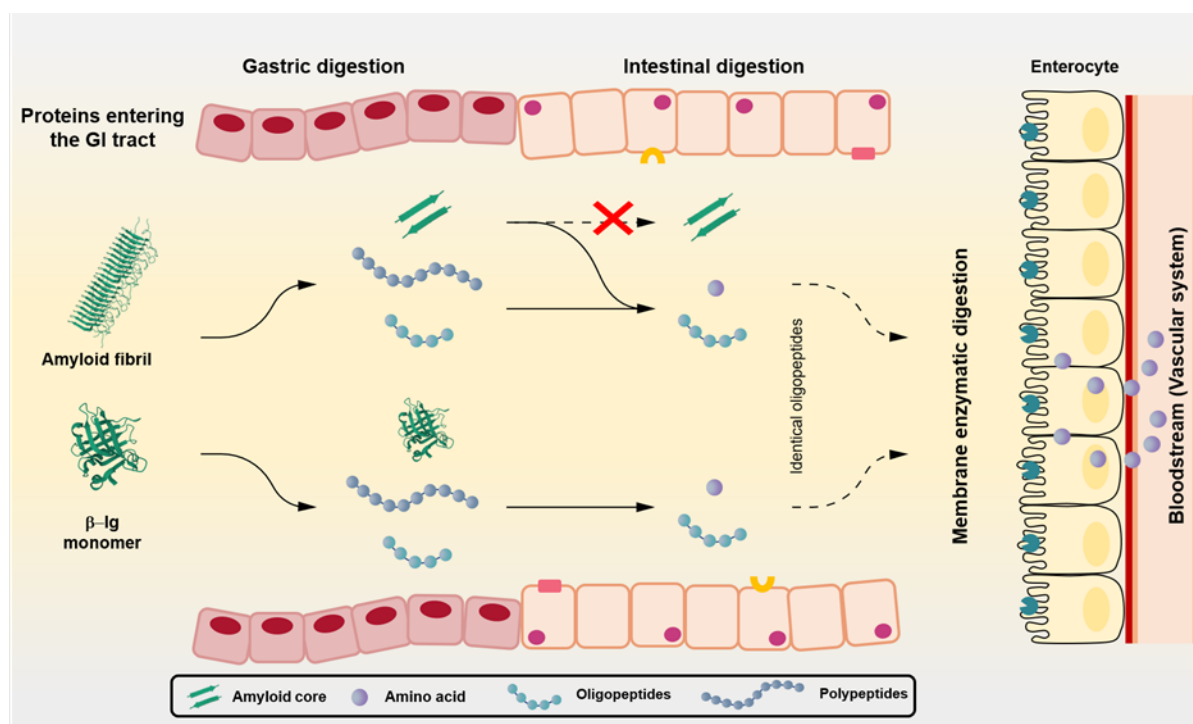

Supplementary Figure 24. Schematic model of  $\beta$ -Ig monomer and amyloid fibrils after entering in the gastrointestinal tract.

Supplementary Table 1. Overview of the molecular mass (Da) in the reflector mode of MALDI-MS spectra of the peptides derived from intestinal digested  $\beta$ -Ig monomers (upper table) and  $\beta$ -Ig amyloid fibril (lower table). The yellow color identifies common peaks in both systems, green color peaks found only in one system, and red peaks those sequences not belonging to  $\beta$ -Ig primary structure.

The two green peaks at Peak-1 (815.45 Da) and Peak-16 (1354.71 Da) found in the digested  $\beta$ -Ig fibrils (lower table) but not in the digested monomers (upper table) can be sequenced into either VRTPEVD, or NENKVLV or VEELKPT for 815.45 Da and as YSLAMAASDISLL or QKVAGTWYSLAM for 1354.71 Da. We find the VRTPEVD in the Peak-15 from the monomer (**VRTPEVDD**), NENKVLV in the Peak-53 from the monomer (IDALNENKVLVLVD), VEELKPT in the Peak-75 from the monomer (RVYVEELKPTPEGDLE). Furthermore, we find **YSLAMAASDISLL** in the Peak-75b from the monomer (**SLAMAASDISLLDAQSAPL**), and **QKVAGTWYSLAM** in the Peak-53b from the monomer (**KVAGTWYSLAMAAS**). The subscript b indicates homologue possible sequences corresponding to the same m/z peak in the reflector mode.

Peaklist (intestinal digested  $\beta$ -Ig monomers):

| Peak | Mass     | Intensity | Peak | Mass     | Intensity | Peak | Mass     | Intensity | Peak | Mass     | Intensity | Peak | Mass     | Intensity |
|------|----------|-----------|------|----------|-----------|------|----------|-----------|------|----------|-----------|------|----------|-----------|
| 1    | 603.217  | 529.223   | 2    | 609.230  | 471.709   | 3    | 622.063  | 1126.373  | 4    | 645.239  | 721.532   | 5    | 653.120  | 745.222   |
| 6    | 656.075  | 982.878   | 7    | 672.050  | 627.234   | 8    | 678.370  | 470.134   | 9    | 700.345  | 1099.990  | 10   | 723.345  | 2112.598  |
| 11   | 739.319  | 570.177   | 12   | 745.328  | 590.261   | 13   | 834.471  | 789.252   | 14   | 865.380  | 526.304   | 15   | 930.483  | 921.831   |
| 16   | 969.564  | 616.011   | 17   | 983.515  | 677.672   | 18   | 985.519  | 1912.590  | 19   | 993.352  | 1678.243  | 20   | 998.195  | 1167.329  |
| 21   | 1041.597 | 2163.722  | 22   | 1051.380 | 1011.431  | 23   | 1059.533 | 4112.574  | 24   | 1063.507 | 1901.394  | 25   | 1079.542 | 685.755   |
| 26   | 1085.552 | 674.789   | 27   | 1098.604 | 830.306   | 28   | 1100.824 | 822.084   | 29   | 1105.542 | 1080.633  | 30   | 1117.533 | 1444.834  |
| 31   | 1121.457 | 1564.328  | 32   | 1124.493 | 621.961   | 33   | 1130.574 | 2570.831  | 34   | 1139.518 | 741.471   | 35   | 1162.667 | 765.764   |
| 36   | 1179.464 | 1847.839  | 37   | 1204.656 | 1551.644  | 38   | 1242.452 | 1546.491  | 39   | 1245.634 | 21450.852 | 40   | 1257.681 | 633.764   |
| 41   | 1267.612 | 1388.877  | 42   | 1276.713 | 1606.007  | 43   | 1313.492 | 3936.697  | 44   | 1320.812 | 693.595   | 45   | 1370.548 | 1596.224  |
| 46   | 1372.712 | 8722.160  | 47   | 1379.518 | 1322.250  | 48   | 1385.744 | 756.767   | 49   | 1401.743 | 1056.314  | 50   | 1435.740 | 641.677   |
| 51   | 1441.591 | 3088.445  | 52   | 1450.557 | 871.357   | 53   | 1455.779 | 12818.493 | 54   | 1477.761 | 1123.584  | 55   | 1489.802 | 803.885   |
| 56   | 1499.598 | 2153.259  | 57   | 1500.813 | 19767.711 | 58   | 1507.735 | 752.318   | 59   | 1508.561 | 3281.540  | 60   | 1554.640 | 1257.151  |
| 61   | 1568.861 | 888.096   | 62   | 1569.647 | 831.125   | 63   | 1605.803 | 576.850   | 64   | 1618.845 | 2042.522  | 65   | 1636.662 | 2945.761  |
| 66   | 1682.739 | 1050.647  | 67   | 1735.894 | 585.658   | 68   | 1749.708 | 804.046   | 69   | 1762.916 | 1161.633  | 70   | 1764.718 | 798.021   |
| 71   | 1789.948 | 1151.980  | 72   | 1805.844 | 15968.747 | 73   | 1821.837 | 1264.137  | 74   | 1840.961 | 1050.302  | 75   | 1873.936 | 575.671   |
| 76   | 1877.804 | 636.762   | 77   | 1930.962 | 1293.396  | 78   | 2025.824 | 1263.884  | 79   | 2060.004 | 1721.467  | 80   | 2146.057 | 730.577   |
| 81   | 2264.098 | 732.681   | 82   | 2283.138 | 739.073   | 83   | 2293.167 | 449.104   | 84   | 2309.162 | 451.180   | 85   | 2371.173 | 1111.265  |
| 86   | 2427.161 | 510.417   | 87   | 2484.192 | 714.835   | 88   | 2502.252 | 500.385   | 89   | 2638.302 | 500.977   | 90   | 2654.298 | 5950.509  |
| 91   | 2670.289 | 1085.505  | 92   | 2676.277 | 486.235   | 93   | 2711.322 | 452.118   | 94   | 2728.324 | 437.691   | 95   | 2770.349 | 530.862   |
| 96   | 2825.373 | 619.551   | 97   | 2884.435 | 449.940   | 98   | 2983.506 | 370.414   | 99   | 3013.484 | 361.751   | 100  | 4655.182 | 209.546   |

Peaklist (intestinal digested  $\beta$ -Ig fibrils):

| Peak | Mass     | Intensity | Peak | Mass     | Intensity | Peak | Mass     | Intensity | Peak | Mass     | Intensity | Peak | Mass     | Intensity |
|------|----------|-----------|------|----------|-----------|------|----------|-----------|------|----------|-----------|------|----------|-----------|
| 1    | 815.452  | 238.102   | 2    | 930.489  | 845.716   | 3    | 969.562  | 668.090   | 4    | 1059.540 | 1232.294  | 5    | 1098.613 | 639.551   |
| 6    | 1105.645 | 464.812   | 7    | 1112.567 | 1005.423  | 8    | 1130.581 | 990.805   | 9    | 1162.667 | 351.192   | 10   | 1204.665 | 344.243   |
| 11   | 1242.455 | 493.961   | 12   | 1276.717 | 824.329   | 13   | 1313.498 | 665.976   | 14   | 1326.737 | 425.648   | 15   | 1353.494 | 377.019   |
| 16   | 1354.710 | 932.857   | 17   | 1377.514 | 392.294   | 18   | 1385.747 | 447.782   | 19   | 1435.743 | 334.857   | 20   | 1489.808 | 416.643   |
| 21   | 1569.659 | 369.709   | 22   | 1627.662 | 303.885   | 23   | 1789.860 | 382.397   | 24   | 1805.860 | 4232.172  | 25   | 1821.859 | 369.263   |
| 26   | 1840.970 | 337.542   | 27   | 1873.952 | 291.859   | 28   | 1916.167 | 285.185   | 29   | 1930.975 | 543.228   | 30   | 2025.842 | 410.787   |
| 31   | 2060.025 | 1006.562  | 32   | 2197.101 | 237.837   | 33   | 2146.081 | 572.876   | 34   | 2264.121 | 327.610   | 35   | 2265.311 | 218.201   |
| 36   | 2283.165 | 374.299   | 37   | 2293.192 | 290.334   | 38   | 2309.187 | 305.770   | 39   | 2371.205 | 918.921   | 40   | 2427.201 | 235.463   |
| 41   | 2485.253 | 269.980   | 42   | 2502.283 | 250.464   | 43   | 2638.333 | 202.699   | 44   | 2654.331 | 2630.364  | 45   | 2670.322 | 461.713   |
| 46   | 2685.384 | 205.118   | 47   | 2727.360 | 193.678   | 48   | 2770.377 | 213.703   | 49   | 2800.399 | 189.984   | 50   | 2826.414 | 259.355   |
| 51   | 2884.473 | 177.885   | 52   | 2910.493 | 159.999   | 53   | 3013.517 | 156.093   | 54   | 3025.528 | 172.133   | 55   | 4655.263 | 104.737   |

Supplementary Table 2. Relative motility of *C. elegans* fed with monomer, amyloid fibrils, and *in-vitro* digested amyloid fibrils of  $\beta$ -lg and lysozyme.

| Days of adulthood | Control |       |       | $\beta$ -lg monomer | $\beta$ -lg monomer digested | $\beta$ -lg fibril | $\beta$ -lg fibril digested | Lysozyme monomer | Lysozyme monomer digested | Lysozyme fibril | Lysozyme fibril digested | Digest buffer control |
|-------------------|---------|-------|-------|---------------------|------------------------------|--------------------|-----------------------------|------------------|---------------------------|-----------------|--------------------------|-----------------------|
| 3                 | 1       | 1     | 1     | 1                   | 1                            | 1                  | 1                           | 1                | 1                         | 1               | 1                        | 1                     |
| 5                 | 0.995   | 1.060 | 1.072 | 0.982               | 1.017                        | 1.371              | 1.094                       | 1.148            | 1.118                     | 1.078           | 1.123                    | 1.164                 |
| 7                 | 0.859   | 0.972 | 0.997 | 0.819               | 0.977                        | 1.089              | 0.953                       | 1.029            | 0.951                     | 1.027           | 1.047                    | 1.045                 |
| 10                | 0.631   | 0.754 | 0.795 | 0.672               | 0.740                        | 0.838              | 0.861                       | 0.825            | 0.767                     | 0.918           | 0.783                    | 0.693                 |
| 12                | 0.579   | 0.640 | 0.578 | 0.481               | 0.556                        | 0.795              | 0.590                       | 0.682            | 0.557                     | 0.887           | 0.669                    | 0.490                 |
| 14                | 0.805   | 0.821 | 0.865 | 0.565               | 0.689                        | 0.810              | 0.738                       | 0.708            | 0.792                     | 0.939           | 0.688                    | 0.775                 |
| 16                | 0.605   | 0.731 | 0.763 | 0.639               | 0.595                        | 1.074              | 0.615                       | 0.697            | 0.611                     | 1.087           | 0.761                    | 0.684                 |
| 18                | 0.399   | 0.544 | 0.671 | 0.535               | 0.363                        | 1.188              | 0.508                       | 0.531            | 0.598                     | 0.944           | 0.721                    | 0.484                 |
| 20                | 0.562   | 0.459 | 0.594 | 0.559               | 0.418                        | 0.926              | 0.439                       | 0.433            | 0.469                     | 0.742           | 0.712                    | 0.286                 |
| 21                | 0.415   | 0.254 | 0.344 | 0.389               | 0.284                        | 0.930              | 0.385                       | 0.389            | 0.370                     | 0.838           | 0.405                    | 0.272                 |
| 22                | 0.247   | 0.090 | 0.076 | 0.284               | 0.149                        | 0.834              | 0.363                       | 0.290            | 0.243                     | 0.590           | 0.471                    | 0.189                 |
| 23                | 0.160   | 0.038 | 0.060 | 0.136               | 0.201                        | 0.424              | 0.118                       | 0.128            | 0.099                     | 0.512           | 0.286                    | 0.180                 |
| 24                | 0.135   | 0.008 | 0.020 | 0.096               | 0.048                        | 0.408              | 0.047                       | 0.096            | 0.031                     | 0.229           | 0.151                    | 0.063                 |
| 25                | 0.062   | 0.003 | 0.014 | 0.089               | 0.082                        | 0.403              | 0.157                       | 0.149            | 0.066                     | 0.266           | 0.194                    | 0.039                 |

Supplementary Table 3. Number of Q35 aggregates per worm fed with monomer, amyloid fibrils, and *in-vitro* digested amyloid fibrils of  $\beta$ -lg and lysozyme.

| Control | $\beta$ -lg<br>monomer<br>1.5 mg/ml | $\beta$ -lg<br>monomer<br>0.25mg/ml | $\beta$ -lg<br>fibril<br>1.5 mg/ml | $\beta$ -lg<br>fibril<br>0.25mg/ml | $\beta$ -lg fibril<br>digested<br>0.25mg/ml | Lysozyme<br>fibril<br>0.25mg/ml | Lysozyme<br>fibril<br>1.5 mg/ml | Lysozyme<br>digested<br>0.25mg/ml | Lysozyme<br>monomer<br>0.25mg/ml | Lysozyme<br>monomer<br>1.5 mg/ml |
|---------|-------------------------------------|-------------------------------------|------------------------------------|------------------------------------|---------------------------------------------|---------------------------------|---------------------------------|-----------------------------------|----------------------------------|----------------------------------|
| 10      | 4                                   | 5                                   | 6                                  | 9                                  | 6                                           | 7                               | 14                              | 10                                | 5                                | 3                                |
| 5       | 8                                   | 6                                   | 7                                  | 9                                  | 7                                           | 2                               | 11                              | 7                                 | 8                                | 7                                |
| 9       | 12                                  | 12                                  | 8                                  | 10                                 | 9                                           | 9                               | 6                               | 2                                 | 6                                | 17                               |
| 6       | 12                                  | 4                                   | 7                                  | 10                                 | 6                                           | 7                               | 7                               | 10                                | 8                                | 6                                |
| 5       | 8                                   | 9                                   | 9                                  | 7                                  | 6                                           | 2                               | 7                               | 4                                 | 2                                | 5                                |
| 9       | 11                                  | 13                                  | 10                                 | 2                                  | 9                                           | 11                              | 16                              | 8                                 | 7                                | 8                                |
| 6       | 11                                  | 9                                   | 14                                 | 8                                  | 11                                          | 6                               | 10                              | 10                                | 10                               | 8                                |
| 10      | 1                                   | 5                                   | 9                                  | 11                                 | 3                                           | 9                               | 11                              | 5                                 | 13                               | 11                               |
| 7       | 3                                   | 7                                   | 10                                 | 9                                  | 7                                           | 6                               | 10                              | 12                                | 7                                | 12                               |
| 9       | 9                                   | 7                                   | 11                                 | 10                                 | 4                                           | 8                               | 9                               | 15                                | 4                                | 7                                |
| 3       | 8                                   | 3                                   | 6                                  | 8                                  | 6                                           | 12                              | 7                               | 7                                 | 9                                | 20                               |
| 2       | 9                                   | 9                                   | 9                                  | 10                                 | 6                                           | 6                               | 7                               | 13                                | 8                                | 9                                |
| 6       | 9                                   | 15                                  | 6                                  | 6                                  | 12                                          | 7                               | 9                               | 6                                 | 5                                | 5                                |
| 8       | 8                                   | 11                                  | 9                                  | 4                                  | 14                                          | 3                               | 12                              | 9                                 | 8                                | 10                               |
| 12      | 10                                  | 10                                  | 10                                 | 8                                  | 6                                           | 5                               | 7                               | 2                                 | 9                                | 3                                |
| 3       | 12                                  | 6                                   | 8                                  | 7                                  | 7                                           | 10                              | 10                              | 6                                 | 6                                | 9                                |
| 7       | 12                                  | 6                                   | 9                                  | 8                                  | 7                                           | 10                              | 10                              | 8                                 | 10                               | 6                                |
| 13      | 2                                   | 13                                  | 12                                 | 11                                 | 6                                           | 8                               | 12                              | 3                                 | 2                                | 8                                |
| 5       | 6                                   | 7                                   | 7                                  | 15                                 | 8                                           | 6                               | 6                               | 6                                 | 9                                | 7                                |
| 7       | 6                                   | 7                                   | 7                                  | 6                                  | 9                                           | 14                              | 9                               | 6                                 | 5                                | 7                                |
| 5       | 11                                  | 4                                   | 7                                  | 8                                  | 9                                           | 8                               | 13                              | 7                                 | 1                                | 7                                |
| 5       | 4                                   | 5                                   | 6                                  | 9                                  | 14                                          | 9                               | 11                              | 6                                 | 9                                | 7                                |
| 5       | 17                                  | 13                                  | 8                                  | 8                                  | 8                                           | 11                              | 9                               | 7                                 | 7                                | 5                                |
| 4       | 5                                   | 8                                   | 11                                 | 18                                 | 7                                           | 6                               | 10                              | 12                                | 5                                | 5                                |
| 8       | 6                                   | 7                                   | 13                                 | 8                                  | 6                                           | 6                               | 5                               | 6                                 | 9                                | 7                                |
| 7       | 12                                  | 9                                   | 9                                  | 6                                  | 7                                           | 8                               | 9                               | 5                                 | 9                                | 19                               |
| 7       | 13                                  | 7                                   | 16                                 | 5                                  | 7                                           | 4                               | 9                               | 7                                 | 7                                | 9                                |
| 6       | 4                                   | 4                                   | 11                                 | 7                                  | 9                                           | 6                               | 9                               | 8                                 | 5                                | 6                                |
| 9       | 5                                   | 5                                   |                                    | 6                                  | 6                                           | 10                              | 11                              | 8                                 | 4                                | 7                                |
| 12      | 7                                   |                                     |                                    | 6                                  | 9                                           | 6                               | 15                              | 6                                 | 7                                | 5                                |
| 14      |                                     |                                     |                                    | 8                                  |                                             | 7                               | 9                               | 10                                |                                  |                                  |
| 10      |                                     |                                     |                                    | 13                                 |                                             |                                 | 11                              |                                   |                                  |                                  |
| 11      |                                     |                                     |                                    | 15                                 |                                             |                                 | 15                              |                                   |                                  |                                  |
| 8       |                                     |                                     |                                    | 9                                  |                                             |                                 |                                 |                                   |                                  |                                  |
| 3       |                                     |                                     |                                    |                                    |                                             |                                 |                                 |                                   |                                  |                                  |
| 3       |                                     |                                     |                                    |                                    |                                             |                                 |                                 |                                   |                                  |                                  |
| 9       |                                     |                                     |                                    |                                    |                                             |                                 |                                 |                                   |                                  |                                  |
| 11      |                                     |                                     |                                    |                                    |                                             |                                 |                                 |                                   |                                  |                                  |
| 8       |                                     |                                     |                                    |                                    |                                             |                                 |                                 |                                   |                                  |                                  |
| 5       |                                     |                                     |                                    |                                    |                                             |                                 |                                 |                                   |                                  |                                  |

Supplementary Table 4. Detection of peptides in mice serum after 1h digestion\*

| Sequence    | Length | Mass      | Location |
|-------------|--------|-----------|----------|
| MHIRLSFNPTQ | 11     | 1342.6816 | 161-171  |
| KIDALNE     | 7      | 801.42323 | 99-105   |

\*No peptides benchmarked against sequences of  $\beta$ -lg and lysozyme were detected in mice serum after 1h digestion. The only two identified oligopeptides reported in Table S3 which could match  $\beta$ -lg sequences were found in the blood serum of all mice groups: mice fed with  $\beta$ -lg monomers, mice fed with  $\beta$ -lg amyloids and control mice. All mice were starved for 24 h prior to administration. This demonstrates that the presence of these two oligopeptide sequences is not coming from exogenous  $\beta$ -lg amyloids diet.
